# Supplementary material for: Thromboembolic and neurologic sequelae of discontinuation of an antihyperlipidemic drug during ongoing warfarin therapy
Source: PubMed Central journal article supplement (PMC5740131; doi:10.1038/s41598-017-18318-6), 2017-12-21
Supplement: 41598_2017_18318_MOESM1_ESM.pdf [file 41598_2017_18318_MOESM1_ESM.pdf]

---

## **SUPPLEMENTARY INFORMATION**

Supplementary information for “Thromboembolic and neurologic sequelae of discontinuation of an antihyperlipidemic drug during ongoing warfarin therapy” by Charles E. Leonard, Colleen M. Brensinger, Warren B. Bilker, Stephen E. Kimmel, Heather J. Whitaker, and Sean Hennessy

**Appendix Figure 1. Depicted example of an offset drug-drug interaction (DDI) in which concomitancy was object drug triggered**

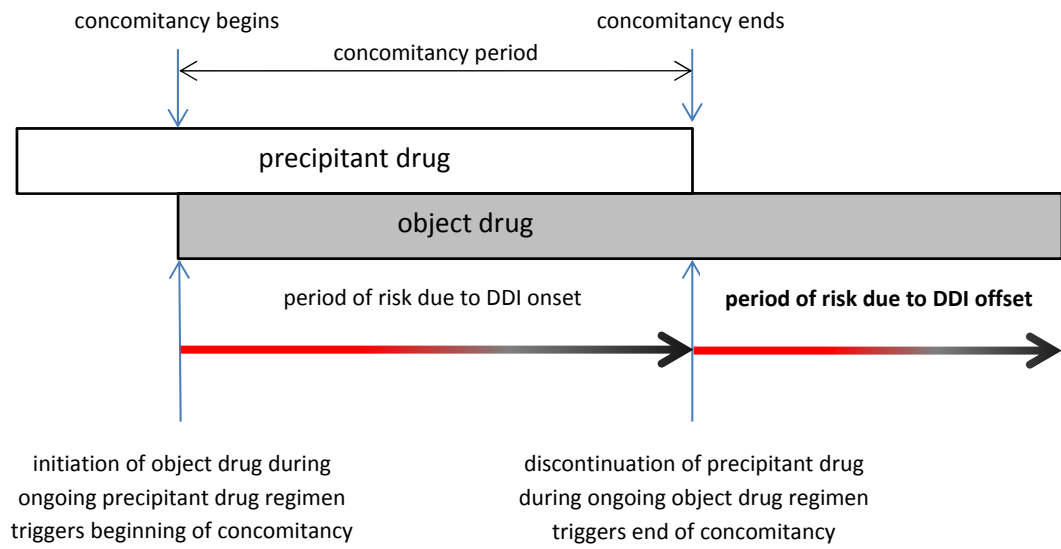

**Appendix Table 1. Risk of venous thromboembolism/ischemic stroke within 90 days of discontinuing an antihyperlipidemic of interest in the presence of ongoing warfarin therapy**

|              | Each antihyperlipidemic |                  | Ratio of antihyperlipidemic of interest to pravastatin |                  |
|--------------|-------------------------|------------------|--------------------------------------------------------|------------------|
|              | Crude IRR               | Adjusted IRR     | Crude IRR                                              | Adjusted IRR     |
| atorvastatin | 0.55 (0.34–0.89)        | 0.72 (0.43–1.20) | 0.69 (0.26–1.82)                                       | 0.53 (0.18–1.53) |
| fenofibrate  | 0.32 (0.06–1.68)        | 0.27 (0.05–1.48) | 0.41 (0.06–2.58)                                       | 0.20 (0.03–1.38) |
| gemfibrozil  | 0.83 (0.06–11.2)        | 2.16 (0.06–75.0) | 1.05 (0.07–16.1)                                       | 1.59 (0.04–62.2) |
| lovastatin   | 0.43 (0.11–1.62)        | 0.41 (0.10–1.69) | 0.54 (0.11–2.59)                                       | 0.30 (0.06–1.64) |
| pravastatin  | 0.79 (0.34–1.83)        | 1.36 (0.54–3.45) | referent                                               | referent         |
| rosuvastatin | 0.28 (0.03–2.80)        | 0.21 (0.02–2.82) | 0.36 (0.03–4.09)                                       | 0.16 (0.01–2.44) |
| simvastatin  | 0.68 (0.41–1.12)        | 0.91 (0.52–1.59) | 0.85 (0.32–2.26)                                       | 0.67 (0.23–1.99) |

IRR = incidence rate ratio

**Appendix Table 2. Findings from prespecified and post hoc secondary analyses, in which pravastatin findings were not set as the referent**

| Analysis*                                                                                                                                                                                                                                                                                                                                                                                                                                                                                                                                                                                                                                                                                                                               |            | Adjusted IRRs (95% CIs) for antihyperlipidemic of interest |                      |                     |                     |                     |                     |                     |
|-----------------------------------------------------------------------------------------------------------------------------------------------------------------------------------------------------------------------------------------------------------------------------------------------------------------------------------------------------------------------------------------------------------------------------------------------------------------------------------------------------------------------------------------------------------------------------------------------------------------------------------------------------------------------------------------------------------------------------------------|------------|------------------------------------------------------------|----------------------|---------------------|---------------------|---------------------|---------------------|---------------------|
|                                                                                                                                                                                                                                                                                                                                                                                                                                                                                                                                                                                                                                                                                                                                         |            | fibrates                                                   |                      | statins             |                     |                     |                     |                     |
|                                                                                                                                                                                                                                                                                                                                                                                                                                                                                                                                                                                                                                                                                                                                         |            | feno                                                       | gem                  | rosuva              | atorva              | prava               | lova                | simva               |
| <b>Further elucidating the association between antihyperlipidemic discontinuation and outcome</b>                                                                                                                                                                                                                                                                                                                                                                                                                                                                                                                                                                                                                                       |            |                                                            |                      |                     |                     |                     |                     |                     |
| Stratify risk segment                                                                                                                                                                                                                                                                                                                                                                                                                                                                                                                                                                                                                                                                                                                   | Days 1–30  | 0.43<br>(0.08-2.43)                                        | 8.93<br>(0.19-414.8) | 0.37<br>(0.04-3.84) | 0.76<br>(0.44-1.33) | 1.75<br>(0.68-4.46) | 0.51<br>(0.13-1.91) | 0.74<br>(0.39-1.41) |
|                                                                                                                                                                                                                                                                                                                                                                                                                                                                                                                                                                                                                                                                                                                                         | Days 31–60 | ND                                                         | ND                   | ND                  | 0.51<br>(0.19-1.41) | ND                  | ND                  | 2.21<br>(0.94-5.22) |
|                                                                                                                                                                                                                                                                                                                                                                                                                                                                                                                                                                                                                                                                                                                                         | Days 61–90 | ND                                                         | ND                   | ND                  | 0.62<br>(0.20-1.98) | 1.52<br>(0.14-16.0) | ND                  | 0.33<br>(0.04-2.92) |
| Deconstruct composite outcome                                                                                                                                                                                                                                                                                                                                                                                                                                                                                                                                                                                                                                                                                                           | VTE        | 0.15<br>(0.02-1.37)                                        | 1.44<br>(0.06-34.0)  | 0.35<br>(0.02-6.15) | 0.43<br>(0.22-0.83) | 0.99<br>(0.33-2.96) | 0.62<br>(0.15-2.56) | 0.65<br>(0.32-1.32) |
|                                                                                                                                                                                                                                                                                                                                                                                                                                                                                                                                                                                                                                                                                                                                         | IS         | 1.43<br>(0.09-24.1)                                        | ND                   | ND                  | 2.67<br>(1.14-6.71) | 3.16<br>(0.51-19.7) | ND                  | 1.47<br>(0.62-3.52) |
| Lump antihyperlipidemics of interest by likelihood of CYP2C9 inhibition**                                                                                                                                                                                                                                                                                                                                                                                                                                                                                                                                                                                                                                                               |            | 0.66<br>(0.41-1.05)                                        |                      |                     |                     | 0.93<br>(0.59-1.46) |                     |                     |
| Lump antihyperlipidemics of interest by likelihood of interacting with warfarin, per Truven Micromedex and Facts & Comparisons DDI module ratings**                                                                                                                                                                                                                                                                                                                                                                                                                                                                                                                                                                                     |            | 0.70<br>(0.44-1.13)                                        |                      |                     | 0.82<br>(0.53-1.27) |                     | †                   |                     |
| <b>Assessing SCCS underlying assumptions, minimizing the role of bias and/or confounding</b>                                                                                                                                                                                                                                                                                                                                                                                                                                                                                                                                                                                                                                            |            |                                                            |                      |                     |                     |                     |                     |                     |
| Increase maximum length of risk segment from 90 to 120 days††                                                                                                                                                                                                                                                                                                                                                                                                                                                                                                                                                                                                                                                                           |            | 0.30<br>(0.05-1.68)                                        | 1.75<br>(0.03-94.1)  | 0.33<br>(0.04-2.71) | 0.74<br>(0.45-1.20) | 1.60<br>(0.64-4.00) | 0.63<br>(0.18-2.14) | 0.85<br>(0.49-1.50) |
| Exclude segments occurring before the first risk segment (i.e., conduct left-censored unidirectional SCCS)                                                                                                                                                                                                                                                                                                                                                                                                                                                                                                                                                                                                                              |            | ND                                                         | ND                   | ND                  | 0.49<br>(0.17-1.40) | 0.53<br>(0.06-5.08) | ND                  | 0.44<br>(0.17-1.14) |
| Exclude segments occurring after the first risk and indeterminate risk segments (i.e., conduct right-censored unidirectional SCCS)                                                                                                                                                                                                                                                                                                                                                                                                                                                                                                                                                                                                      |            | 0.21<br>(0.03-1.57)                                        | 2.03<br>(0.06-72.8)  | 0.41<br>(0.03-5.25) | 0.66<br>(0.38-1.15) | 0.80<br>(0.29-2.18) | 0.68<br>(0.13-3.48) | 0.81<br>(0.44-1.49) |
| Reclassify second or later risk and indeterminate risk segments as non-risk segments                                                                                                                                                                                                                                                                                                                                                                                                                                                                                                                                                                                                                                                    |            | 0.31<br>(0.05-1.79)                                        | 2.16<br>(0.06-75.0)  | 0.41<br>(0.03-5.34) | 0.77<br>(0.46-1.30) | 1.43<br>(0.56-3.66) | 0.61<br>(0.16-2.26) | 0.95<br>(0.54-1.67) |
| Include average daily dose of warfarin as covariate in outcome model                                                                                                                                                                                                                                                                                                                                                                                                                                                                                                                                                                                                                                                                    |            | 0.23<br>(0.03-1.48)                                        | 8.09<br>(0.32-205.8) | 0.33<br>(0.02-4.42) | 0.85<br>(0.49-1.49) | 0.95<br>(0.32-2.77) | 0.35<br>(0.08-1.52) | 0.91<br>(0.50-1.67) |
| Exclude subjects with >1 outcome during the observation period                                                                                                                                                                                                                                                                                                                                                                                                                                                                                                                                                                                                                                                                          |            | 0.33<br>(0.06-1.82)                                        | 2.16<br>(0.06-75.0)  | 0.30<br>(0.02-3.77) | 0.77<br>(0.43-1.36) | 0.89<br>(0.31-2.59) | 0.66<br>(0.16-2.75) | 1.05<br>(0.59-1.90) |
| Exclude subjects that die during the observation period                                                                                                                                                                                                                                                                                                                                                                                                                                                                                                                                                                                                                                                                                 |            | 0.31<br>(0.05-1.73)                                        | 1.72<br>(0.06-46.5)  | 0.21<br>(0.02-2.82) | 0.62<br>(0.36-1.06) | 1.45<br>(0.56-3.77) | 0.49<br>(0.12-2.01) | 0.91<br>(0.51-1.62) |
| atorva = atorvastatin; CI = confidence interval; CYP = cytochrome P450; DDI = drug-drug interaction; feno = fenofibrate; gem = gemfibrozil; IRR = incidence rate ratio; IS = ischemic stroke; lova = lovastatin; ND = not detectable / model produced unstable estimates; prava = pravastatin; rosuva = rosuvastatin; SCCS = self-controlled case series; simva = simvastatin; VTE = venous thromboembolism<br>*examining VTE/IS as composite outcome, unless otherwise noted<br>**post hoc analysis<br>†IRR for combined fenofibrate/gemfibrozil/rosuvastatin/lovastatin/simvastatin listed in merged fenofibrate-gemfibrozil-rosuvastatin cell<br>††thereby increases maximum length of indeterminate risk period from 90 to 120 days |            |                                                            |                      |                     |                     |                     |                     |                     |

**Appendix Table 3. Summary of prior findings**

| Author and publication year / PubMed ID    | Design                                                       | Setting / study period                                                                         | Objective / outcome measure(s)                                                                                                                                                                                                                                                                                                                                                                                | Findings                                                                                                                                                                                                                                                                                                                                                                                                                                                                                                                                                                                                                                                         |
|--------------------------------------------|--------------------------------------------------------------|------------------------------------------------------------------------------------------------|---------------------------------------------------------------------------------------------------------------------------------------------------------------------------------------------------------------------------------------------------------------------------------------------------------------------------------------------------------------------------------------------------------------|------------------------------------------------------------------------------------------------------------------------------------------------------------------------------------------------------------------------------------------------------------------------------------------------------------------------------------------------------------------------------------------------------------------------------------------------------------------------------------------------------------------------------------------------------------------------------------------------------------------------------------------------------------------|
| Zhelyazkova- Savova et al. 2014 / 24790817 | Cross-sectional; “observational retrospective study”         | Patients of cardiology clinic of a teaching University hospital in Varna, Bulgaria / 2007–2008 | Investigate incidence of co-prescriptions involving statins and compare exposure of outpatients and inpatients to potential statin-drug interactions / Primary outcome measure: proportion of patients exposed to statin co-prescriptions with potentially-interacting drugs at hospital admission and discharge; secondary outcome measure: laboratory evidence supporting possible statin-drug interactions | Of 1,641 hospitalized patients, 572 were prescribed a statin either at hospital admission or discharge. Exposure to potential statin-drug interactions was similar at hospital admission (26.1%) and discharge (24.4%). Of all interacting drugs, acenocoumarol was most commonly found; the proportions of statin-acenocoumarol co-prescriptions were similar at hospital entry (11.5%) and discharge (12.4%). In seven patients of 69 exposed to the combination, INR was found to be higher in three, indicating a risk of over-anticoagulation. With another patient, the discontinuation of atorvastatin was followed by a decrease of INR from 3.1 to 2.4. |
| McDonald et al. 2012 / 22398967            | Cross-sectional; “retrospective clinical evaluation / study” | Patients of a University-affiliated anticoagulation clinic / 2001–2007                         | Determine mean and range of warfarin dose change required to maintain an INR of 2–3 after amiodarone was added or discontinued in a cohort of patients on stable warfarin therapy / Outcome: mean change in warfarin dose                                                                                                                                                                                     | 73 patients had an out of range INR attributed to a warfarin-amiodarone drug interaction. The mean change in warfarin dose required to maintain an INR of 2–3 was 25.6%. Warfarin dosing change requirements were highly variable, with a range of 5.9% to 65%. 27 of 73 patients had amiodarone discontinued. Mean warfarin dose prior to discontinuation of amiodarone was 3.9mg/day. Mean warfarin dose after discontinuation of amiodarone was 4.8mg/day.                                                                                                                                                                                                    |

**Appendix Table 4. Time-varying covariates included in conditional Poisson regression models**

| Covariate category                         | Covariate component                                                                                                       | Identification method        |
|--------------------------------------------|---------------------------------------------------------------------------------------------------------------------------|------------------------------|
| major non-chronic risk factors for VTE     | VTE in prior 90 days                                                                                                      | ICD-9-CM diagnosis codes     |
|                                            | hospital discharge on current day or in prior 90 days                                                                     | MAX inpatient, MedPAR claims |
| major non-chronic risk factor for IS       | IS in prior 90 days                                                                                                       | ICD-9-CM diagnosis codes     |
| drugs that may increase risk of VTE alone* | selective serotonin reuptake inhibitors / selective norepinephrine reuptake inhibitors on current day or in prior 30 days | NDC                          |
| drugs that may increase risk of IS alone*  | testosterone on current day or in prior 30 days                                                                           | NDC                          |
|                                            | dexamethasone on current day or in prior 30 days                                                                          | NDC                          |
|                                            | methylprednisolone on current day or in prior 30 days                                                                     | NDC                          |
|                                            | epoetin alfa / darbepoetin alfa on current day or in prior 30 days                                                        | NDC                          |
|                                            | filgrastim / sargramostim on current day or in prior 30 days                                                              | NDC                          |
|                                            | diethylstilbestrol on current day or in prior 30 days                                                                     | NDC, HCPCS                   |
|                                            | cyproterone on current day or in prior 30 days                                                                            | NDC                          |
|                                            | flutamide on current day or in prior 30 days                                                                              | NDC                          |
|                                            | goserelin on current day or in prior 30 days                                                                              | NDC, HCPCS                   |
|                                            | leuprolide on current day or in prior 30 days                                                                             | NDC, HCPCS                   |
|                                            | raloxifene on current day or in prior 30 days                                                                             | NDC                          |
|                                            | toremifene on current day or in prior 30 days                                                                             | NDC                          |
|                                            | anastrozole on current day or in prior 30 days                                                                            | NDC                          |
|                                            | megestrol on current day or in prior 30 days                                                                              | NDC                          |
|                                            | cyclosporine on current day or in prior 30 days                                                                           | NDC, HCPCS                   |
|                                            | infliximab on current day or in prior 30 days                                                                             | NDC, HCPCS                   |
|                                            | immune globulins on current day or in prior 30 days                                                                       | NDC, HCPCS                   |
|                                            | interferon gamma-1b on current day or in prior 30 days                                                                    | NDC, HCPCS                   |
|                                            | interferon alfa-2a on current day or in prior 30 days                                                                     | NDC, HCPCS                   |
|                                            | muromonab on current day or in prior 30 days                                                                              | NDC, HCPCS                   |
|                                            | sirolimus / tacrolimus on current day or in prior 30 days                                                                 | NDC, HCPCS                   |
|                                            | aldesleukin on current day or in prior 30 days                                                                            | NDC, HCPCS                   |
|                                            | asparaginase on current day or in prior 30 days                                                                           | NDC, HCPCS                   |
|                                            | basiliximab on current day or in prior 30 days                                                                            | NDC, HCPCS                   |
|                                            | bevacizumab on current day or in prior 30 days                                                                            | NDC, HCPCS                   |
|                                            | bleomycin on current day or in prior 30 days                                                                              | NDC, HCPCS                   |
|                                            | carboplatin on current day or in prior 30 days                                                                            | NDC, HCPCS                   |
|                                            | denileukin on current day or in prior 30 days                                                                             | NDC, HCPCS                   |
|                                            | docetaxel on current day or in prior 30 days                                                                              | NDC, HCPCS                   |
|                                            | estramustine on current day or in prior 30 days                                                                           | NDC                          |
|                                            | fluorouracil on current day or in prior 30 days                                                                           | NDC, HCPCS                   |
|                                            | imatinib on current day or in prior 30 days                                                                               | NDC                          |
|                                            | irinotecan on current day or in prior 30 days                                                                             | NDC, HCPCS                   |

|                                                        |                                                                                                                                                                                                                                                                                                                                                                                                                                                                                                                                                                                                           |                          |
|--------------------------------------------------------|-----------------------------------------------------------------------------------------------------------------------------------------------------------------------------------------------------------------------------------------------------------------------------------------------------------------------------------------------------------------------------------------------------------------------------------------------------------------------------------------------------------------------------------------------------------------------------------------------------------|--------------------------|
|                                                        | lenalidomide on current day or in prior 30 days                                                                                                                                                                                                                                                                                                                                                                                                                                                                                                                                                           | NDC                      |
|                                                        | paclitaxel on current day or in prior 30 days                                                                                                                                                                                                                                                                                                                                                                                                                                                                                                                                                             | NDC, HCPCS               |
|                                                        | thalidomide on current day or in prior 30 days                                                                                                                                                                                                                                                                                                                                                                                                                                                                                                                                                            | NDC                      |
|                                                        | heparins, including low molecular weight heparins on current day or in prior 30 days                                                                                                                                                                                                                                                                                                                                                                                                                                                                                                                      | NDC, HCPCS               |
|                                                        | pentosan on current day or in prior 30 days                                                                                                                                                                                                                                                                                                                                                                                                                                                                                                                                                               | NDC                      |
|                                                        | chlorpromazine on current day or in prior 30 days                                                                                                                                                                                                                                                                                                                                                                                                                                                                                                                                                         | NDC, HCPCS               |
|                                                        | clozapine on current day or in prior 30 days                                                                                                                                                                                                                                                                                                                                                                                                                                                                                                                                                              | NDC                      |
|                                                        | olanzapine on current day or in prior 30 days                                                                                                                                                                                                                                                                                                                                                                                                                                                                                                                                                             | NDC, HCPCS               |
|                                                        | quetiapine on current day or in prior 30 days                                                                                                                                                                                                                                                                                                                                                                                                                                                                                                                                                             | NDC                      |
|                                                        | risperidone on current day or in prior 30 days                                                                                                                                                                                                                                                                                                                                                                                                                                                                                                                                                            | NDC, HCPCS               |
|                                                        | thioridazine on current day or in prior 30 days                                                                                                                                                                                                                                                                                                                                                                                                                                                                                                                                                           | NDC                      |
|                                                        | celecoxib on current day or in prior 30 days                                                                                                                                                                                                                                                                                                                                                                                                                                                                                                                                                              | NDC                      |
|                                                        | acetohydroxamic acid on current day or in prior 14 days                                                                                                                                                                                                                                                                                                                                                                                                                                                                                                                                                   | NDC                      |
|                                                        | botulinum toxins on current day or in prior 30 days                                                                                                                                                                                                                                                                                                                                                                                                                                                                                                                                                       | NDC, HCPCS               |
|                                                        | papaverine on current day or in prior 30 days                                                                                                                                                                                                                                                                                                                                                                                                                                                                                                                                                             | NDC, HCPCS               |
|                                                        | topiramate on current day or in prior 30 days                                                                                                                                                                                                                                                                                                                                                                                                                                                                                                                                                             | NDC                      |
|                                                        | tretinoin on current day or in prior 30 days                                                                                                                                                                                                                                                                                                                                                                                                                                                                                                                                                              | NDC                      |
| drugs that may increase risk of VTE and IS*            | oral contraceptive/hormone replacement therapy on current day or in prior 30 days                                                                                                                                                                                                                                                                                                                                                                                                                                                                                                                         | NDC                      |
|                                                        | nonsteroidal anti-inflammatory drug/cyclooxygenase-2 inhibitor on current day or in prior 30 days                                                                                                                                                                                                                                                                                                                                                                                                                                                                                                         | NDC                      |
|                                                        | tamoxifen on current day or in prior 30 days                                                                                                                                                                                                                                                                                                                                                                                                                                                                                                                                                              | NDC                      |
|                                                        | nicotine replacement therapy on current day or in prior 30 days                                                                                                                                                                                                                                                                                                                                                                                                                                                                                                                                           | NDC                      |
|                                                        | recombinant factor VIIa on current day or in prior 30 days                                                                                                                                                                                                                                                                                                                                                                                                                                                                                                                                                | NDC, HCPCS               |
|                                                        | cisplatin on current day or in prior 30 days                                                                                                                                                                                                                                                                                                                                                                                                                                                                                                                                                              | NDC, HCPCS               |
| major non-chronic diseases that may affect coagulation | acute infection on current day or in prior 14 days                                                                                                                                                                                                                                                                                                                                                                                                                                                                                                                                                        | ICD-9-CM diagnosis codes |
| drugs that may affect coagulation                      | non-warfarin oral anticoagulant on current day or in prior 30 days                                                                                                                                                                                                                                                                                                                                                                                                                                                                                                                                        | NDC                      |
|                                                        | subcutaneous/injectable anticoagulant identifiable in ambulatory claims on current day or in prior 30 days                                                                                                                                                                                                                                                                                                                                                                                                                                                                                                | NDC, HCPCS               |
|                                                        | oral antiplatelet agent on current day or in prior 30 days                                                                                                                                                                                                                                                                                                                                                                                                                                                                                                                                                | NDC                      |
|                                                        | aspirin on current day or in prior 30 days                                                                                                                                                                                                                                                                                                                                                                                                                                                                                                                                                                | NDC                      |
| drugs that may interact with warfarin                  | oral drugs that can interact with warfarin, per Truven Health Analytics Micromedex Solutions, on current day or in prior 30 days: amiodarone, mirtazapine, naproxen, capecitabine, procarbazine, imatinib, fluvoxamine, dronedarone, teriflunomide, cyclophosphamide, methotrexate, erlotinib, leflunomide, etoposide, vilazodone, paroxetine, lomitapide, rivaroxaban, toremide, oxandrolone, mercaptopurine, valproic acid, entacapone, proguanil, ketoprofen, dapson, aprepitant, enzalutamide, prasugrel, methyltestosterone, celecoxib, ropinirole                                                   | NDC                      |
|                                                        | oral drugs that can interact with warfarin, per Truven Health Analytics Micromedex Solutions, on current day or in prior 14 days: levofloxacin, moxifloxacin, erythromycin, cloxacillin, sulfamethoxazole, dicloxacillin, fluconazole, ampicillin, ceftibuten, telithromycin, sulfisoxazole, ciprofloxacin, ketoconazole, gemifloxacin, penicillin, posaconazole, itraconazole, oseltamivir, azithromycin, cefpodoxime, carbenicillin, cefdinir, clarithromycin, ofloxacin, amoxicillin, norfloxacin, cefixime, cephadrine, enoxacin, cefadroxil, cephalixin, nalidixic acid, metronidazole, gatifloxacin | NDC                      |
|                                                        | oral "clinically relevant" CYP2C9 inhibitors, per Indiana University's Clinical Pharmacology drug interaction                                                                                                                                                                                                                                                                                                                                                                                                                                                                                             | NDC                      |

|                                                                                                                                                                                                                                                                                                                                                                                                                                                                                                                                                                                |                                                                                                                                                                                                                       |                   |
|--------------------------------------------------------------------------------------------------------------------------------------------------------------------------------------------------------------------------------------------------------------------------------------------------------------------------------------------------------------------------------------------------------------------------------------------------------------------------------------------------------------------------------------------------------------------------------|-----------------------------------------------------------------------------------------------------------------------------------------------------------------------------------------------------------------------|-------------------|
|                                                                                                                                                                                                                                                                                                                                                                                                                                                                                                                                                                                | website, on current day or in prior 30 days: amiodarone, efavirenz, isoniazid, paroxetine                                                                                                                             |                   |
|                                                                                                                                                                                                                                                                                                                                                                                                                                                                                                                                                                                | oral “clinically relevant” CYP2C9 inhibitors, per Indiana University’s Clinical Pharmacology drug interaction website, on current day or in prior 14 days: fluconazole, metronidazole, sulfamethoxazole, voriconazole | NDC               |
|                                                                                                                                                                                                                                                                                                                                                                                                                                                                                                                                                                                | oral “clinically relevant” CYP2C9 inducers, per Indiana University’s Clinical Pharmacology drug interaction website, on current day or in prior 30 days: carbamazepine, nevirapine, phenobarbital, rifampin           | NDC               |
| therapeutic drug monitoring for warfarin                                                                                                                                                                                                                                                                                                                                                                                                                                                                                                                                       | International Normalized Ratio testing/monitoring, prothrombin time testing/monitoring                                                                                                                                | CPT, HCPCS        |
| average daily warfarin dose**                                                                                                                                                                                                                                                                                                                                                                                                                                                                                                                                                  | defined by (prescription quantity x warfarin tablet strength) / prescription days’ supply                                                                                                                             | NDC, days’ supply |
| <p>CPT = current procedural terminology; CYP = cytochrome p450; HCPCS = healthcare common procedure coding system; ICD-9-CM = international classification of diseases 9<sup>th</sup> revision clinical modification; IS = ischemic stroke; MAX = Medicaid analytic extract; MedPAR = Medicare provider analysis and review; NDC = national drug code; VTE = venous thromboembolism</p> <p>* per Tisdale &amp; Miller’s Drug-induced diseases: prevention, detection, and management. Limited to drugs with evidence level A or B</p> <p>** included in secondary analysis</p> |                                                                                                                                                                                                                       |                   |



**Appendix Table 5. Prespecified and post hoc secondary analyses**

| Analysis                                                                                                                                                                                                                                                     | Rationale                                                                                                                                                                                                       |
|--------------------------------------------------------------------------------------------------------------------------------------------------------------------------------------------------------------------------------------------------------------|-----------------------------------------------------------------------------------------------------------------------------------------------------------------------------------------------------------------|
| <b><i>Further elucidating the association between antihyperlipidemic discontinuation and outcome</i></b>                                                                                                                                                     |                                                                                                                                                                                                                 |
| Stratify risk segment into days 1-30, 31-60, and 61-90                                                                                                                                                                                                       | Facilitates elucidation of duration-response effects                                                                                                                                                            |
| Deconstruct composite outcome and examine VTE and IS separately                                                                                                                                                                                              | Facilitates elucidation of differential effects by outcome component                                                                                                                                            |
| Lump antihyperlipidemics of interest by likelihood of CYP2C9 inhibition (i.e., [atorvastatin, fenofibrate, gemfibrozil, rosuvastatin] vs. [lovastatin, pravastatin, simvastatin])*                                                                           | Facilitates elucidation of potential underlying mechanism; increases statistical precision                                                                                                                      |
| Lump antihyperlipidemics of interest by likelihood of interacting with warfarin, per Truven Micromedex and Facts & Comparisons DDI module ratings (i.e., [fenofibrate, gemfibrozil, lovastatin, rosuvastatin, simvastatin] vs. [atorvastatin, pravastatin])* | Facilitates elucidation of potential underlying mechanism; increases statistical precision                                                                                                                      |
| <b><i>Assessing SCCS underlying assumptions, minimizing the role of bias and/or confounding</i></b>                                                                                                                                                          |                                                                                                                                                                                                                 |
| Increase maximum length of risk segment from 90 to 120 days**                                                                                                                                                                                                | Examines robustness of findings to specification of risk segment length                                                                                                                                         |
| Exclude segments occurring before the first risk segment (i.e., conduct left-censored unidirectional SCCS)                                                                                                                                                   | Minimizes reverse causality bias, although may be prone to exposure-trend bias                                                                                                                                  |
| Exclude segments occurring after the first risk and indeterminate risk segments (i.e., conduct right-censored unidirectional SCCS)                                                                                                                           | Minimizes reverse causality bias, although may be prone to exposure-trend bias                                                                                                                                  |
| Reclassify second or later risk and indeterminate risk segments as non-risk segments                                                                                                                                                                         | Considers effect of depletion of susceptible risk segment                                                                                                                                                       |
| Include average daily dose of warfarin as covariate in outcome model                                                                                                                                                                                         | Controls for potential confounding by time-varying confounding by warfarin dose                                                                                                                                 |
| Exclude subjects with >1 outcome during the observation period                                                                                                                                                                                               | Assesses impact of potential failure of outcome independence assumption; second or later outcomes, if influenced by initial outcome, may cause failure of underlying Poisson model                              |
| Exclude subjects that die during the observation period                                                                                                                                                                                                      | Alleviates concern for death as an ultimate interferent event (and thereby censoring observation time), especially since the outcome of interest increases mortality; alleviates concern for immortal time bias |
| CYP = cytochrome P450; DDI = drug-drug interaction; IS = ischemic stroke; SCCS = self-controlled case series; VTE = venous thromboembolism<br>* post hoc analysis<br>** thereby increases maximum length of indeterminate risk period from 90 to 120 days    |                                                                                                                                                                                                                 |
